# Supplementary material for: Integrated analysis of m6A mRNA methylation in rats with monocrotaline-induced pulmonary arterial hypertension
Source: publisher site journal article supplement (doi:10.18632/aging.203230), 2021-07-26
Supplement: Supplementary file [file aging-v13i14-203230-supplementary-material-SD1.pdf]

SUPPLEMENTARY FIGURE

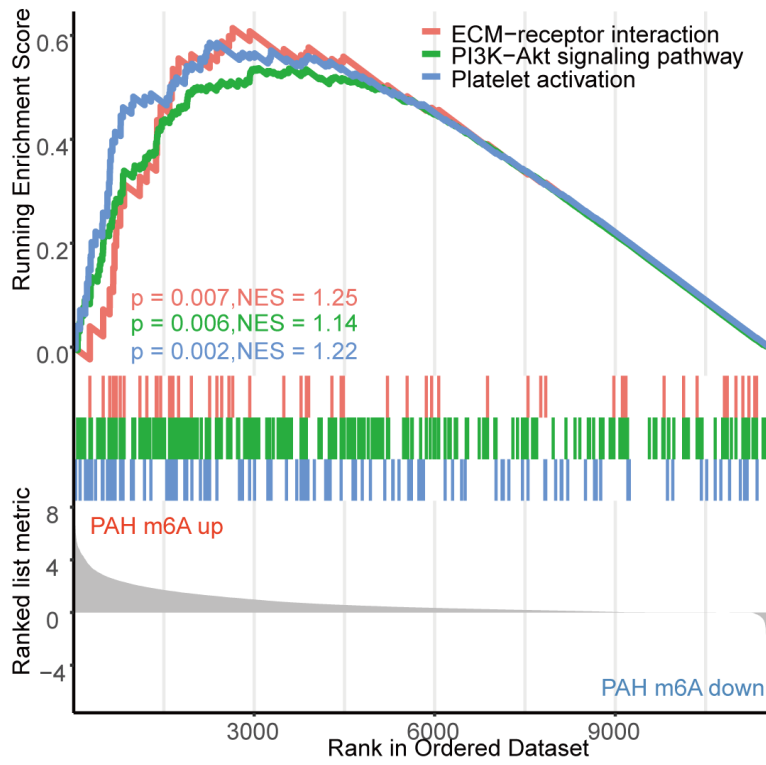

Supplementary Figure 1. GSEA analysis.
